# Supplementary figures and images for: Cataract Surgery following Corneal Allogenic Intrastromal Ring Segments and Implantable Collamer Lens
Source: MDPI journal article supplement (doi:10.3390/jcto1030009), 2023-06-26

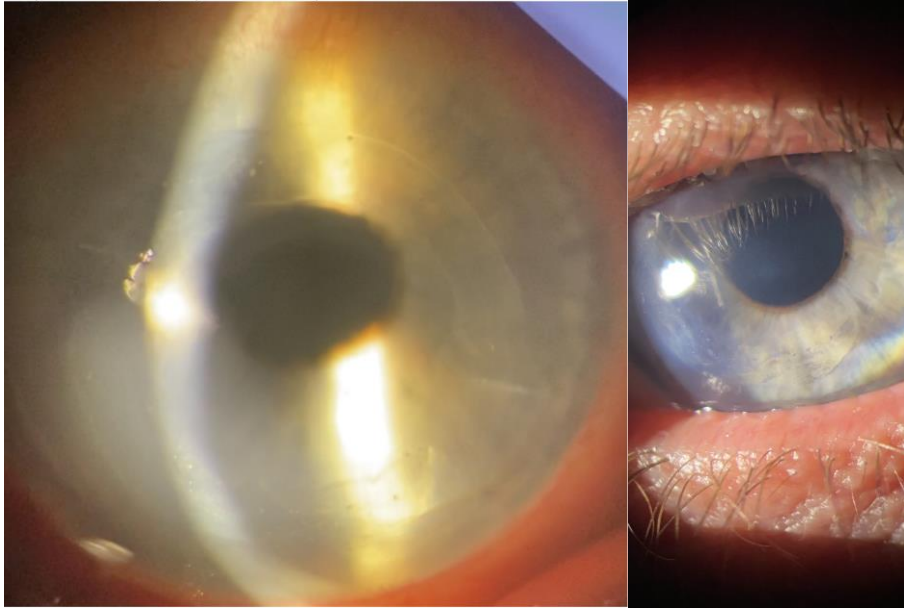

**Figure S1.** Slit lamp findings.

Supplement: s1 [file s1]
